# Supplementary material for: Mangiferin improves hepatic damage-associated molecular patterns, lipid metabolic disorder and mitochondrial dysfunction in alcohol hepatitis rats
Source: Royal Society of Chemistry journal article supplement (doi:10.1039/c9fo00153k), 2019-01-01
Supplement: c9fo00153k1.pdf [file c9fo00153k1.pdf]

## Supporting information

### **Mangiferin improves hepatic damage-associated molecular patterns, lipid metabolic disorder and Mitochondrial Function in the alcohol hepatitis rats**

Mengran Li<sup>1</sup>, Chunxiao Wu<sup>1</sup>, Hongbin Guo, Ce Chu, Mingye Hu, Chengyan Zhou\*

College of Pharmaceutical Sciences, Key Laboratory of Pharmaceutical Quality Control of Hebei Province, Hebei University, 180 WuSi Road, Lianchi District, Baoding 071002, China

#### **Correspondence:**

Chengyan Zhou, phd, College of Pharmaceutical Sciences, Key Laboratory of Pharmaceutical Quality Control of Hebei Province, Hebei University, 180 WuSi Road, Lianchi District, Baoding 071002, China.

Tel/Fax: +86 312 5971107; *E-mail address*: xuefanone@163.com (C.Y. Zhou).

Table S1. Real-time quantitative PCR primer sequences.

| Gene name          | Sequence (5'-3')                                            | Fragment size |
|--------------------|-------------------------------------------------------------|---------------|
| Cas-1              | For: CTGGAGCTTCAGTCAGGTCC<br>Rev: CTTGAGGGAACCACTCGGTC      | 141bp         |
| Cav-1              | For: AACAGGGCAACATCTACAA<br>Rev: TCCGCAATCACATCTTCA         | 163bp         |
| EB1                | For: TCACCTGTCCTCCTAACC<br>Rev: GGCAGCGTCATAATCGT           | 83bp          |
| IL-1 $\beta$       | For: TTGACTTGGGCTGTCCAGATGAGAG<br>Rev: ATGAAGGAAAAGAAGGTGCT | 175bp         |
| NF- $\kappa$ B p65 | For: ATGGACGATCTGTTTCCC<br>Rev: GTCTTAGTGGTATCTGTGCT        | 136bp         |
| NLRP3              | For: GACCAGGTTCACTGTGTTTT<br>Rev: GGTTGGTGCTTAGACTTGAG      | 212bp         |
| OPA-1              | For: CTGCTGTTGGAGGTGGC<br>Rev: CCAGGTCAGGAGCGAAA            | 189bp         |
| PPAR- $\gamma$     | For: TACCACGGTTGATTCTC<br>Rev: TCTACTTTGATCGCACTTT          | 132bp         |
| $\beta$ -actin     | For: CTTGCATCCCTCAGCACCTT<br>Rev: TCCTGTGGACAATGGATGGA      | 140bp         |

Table S2. The equation and the correlation coefficient of FFAs.

| FFAs        | Calibration equation | Regression coefficient |
|-------------|----------------------|------------------------|
| C16:1       | Y=0.1948X+0.2052     | 0.9993                 |
| C16:0       | Y=0.1545X+1.1075     | 1.0000                 |
| C17:3       | Y=0.0214X+0.0348     | 0.9996                 |
| C18:2       | Y=0.1651X+0.2302     | 1.0000                 |
| Trans C18:1 | Y=0.0546X+0.0521     | 0.9994                 |
| C18:1       | Y=0.0977X+0.0592     | 0.9998                 |
| C18:0       | Y=0.0858X+0.3989     | 1.0000                 |
| C20:4       | Y=0.0279X-0.0314     | 0.9997                 |
| C22:6       | Y=0.0855X+0.0565     | 0.9994                 |
| C22:4       | Y=0.01651X+ 0.0349   | 0.9991                 |

\*X: the quality of fatty acids; Y: relative peak area = peak area of fatty acid/peak area of internal standard.

Table S3. The equation and the correlation coefficient of alcohol.

| Calibration equation | Regression coefficient |
|----------------------|------------------------|
| $Y=1.4636X+0.0345$   | 0.9996                 |

\*X: the quality of alcohol; Y: relative peak area = peak area of alcohol/peak area of internal standard.

Table S4. The equation and the correlation coefficient of metallic elements.

| Metallic element | Calibration equation    | Regression coefficient | Limit of detection |
|------------------|-------------------------|------------------------|--------------------|
| Na               | $Y=0.6896X+0.0256$      | 0.9998                 | 6.36               |
| Mg               | $Y=0.3489X+0.0012$      | 0.9998                 | 1.94               |
| K                | $Y=0.4106X+0.0185$      | 0.9998                 | 4.50               |
| Ca               | $Y=0.006X+2.3516$       | 0.9997                 | 6.61               |
| Fe               | $Y=0.00446X+0.003638$   | 1.0000                 | 0.82               |
| Be               | $Y=0.001063X+0.000005$  | 0.9999                 | 0.04               |
| B                | $Y=0.0005665X+0.001112$ | 1.0000                 | 1.25               |
| Ti               | $Y=0.004803X+0.0001774$ | 1.0000                 | 0.46               |
| V                | $Y=0.1471X+0.0008505$   | 0.9999                 | 0.08               |
| Mn               | $Y=0.1295X+0.009352$    | 1.0000                 | 0.12               |
| Co               | $Y=0.3130X+0.003812$    | 1.0000                 | 0.03               |
| Ni               | $Y=0.08126X+0.1035$     | 1.0000                 | 0.06               |
| Cu               | $Y=0.2311X+0.02113$     | 1.0000                 | 0.08               |
| Zn               | $Y=0.04645X+0.03175$    | 1.0000                 | 0.67               |
| Mo               | $Y=0.0026X+0.0000773$   | 1.0000                 | 0.06               |
| Cd               | $Y=0.005893X+0.0000127$ | 1.0000                 | 0.05               |
| Sb               | $Y=0.02207X+0.0002817$  | 1.0000                 | 0.15               |
| Ba               | $Y=0.007617X+0.0005792$ | 1.0000                 | 0.20               |
| Tl               | $Y=0.06783X+0.002180$   | 0.9999                 | 0.02               |
| Pb               | $Y=0.048X+0.001218$     | 1.0000                 | 0.09               |

\*X: the quality of metallic element; Y: relative peak area = peak area of metallic element /peak area of internal standard.

Table S5. Effects of MF on body weights in AH rats.

|                              | NC                        | AL                        | SN                        | MFH                        | MFL                       |
|------------------------------|---------------------------|---------------------------|---------------------------|----------------------------|---------------------------|
| <b>Initial body weight</b>   | 251.18±18.02 <sup>a</sup> | 245.57±10.09 <sup>a</sup> | 242.39±14.58 <sup>a</sup> | 251.85±8.58 <sup>a</sup>   | 251.99±10.79 <sup>a</sup> |
| <b>Final body weight (g)</b> | 509.24±33.02 <sup>a</sup> | 407.07±17.04 <sup>c</sup> | 459.63±24.89 <sup>b</sup> | 451.38±12.05 <sup>b</sup>  | 440.40±34.46 <sup>b</sup> |
| <b>Body weight gain (g)</b>  | 258.46±7.35 <sup>a</sup>  | 161.50±23.14 <sup>d</sup> | 217.24±27.69 <sup>b</sup> | 199.53±14.65 <sup>bc</sup> | 188.41±20.49 <sup>c</sup> |

NC, normal group (0.9% normal saline 10 mL/kg/day); AL, alcohol group (40% alcohol 10 mL/kg/day); SN, silybin group (40% alcohol 10 mL/kg/day + SN 18.9 mg/kg/day); MFH, high-dose mangiferin group (40% alcohol 10 mL/kg/day + MF 100 mg/kg/day); MFL, low-dose mangiferin group (40% alcohol 10 mL/kg/day + MF 50 mg/kg/day). Values are presented as means ± SD for all groups (n = 10). <sup>a-d</sup> Means in the same column followed by different letters are significantly different ( $p < 0.05$ ) according to Tukey's multiple comparisons test.

Table S6. The content of biochemical markers in the serum in the 6-week.

|               | NC                      | AL                       |
|---------------|-------------------------|--------------------------|
| ALT (U/L)     | 28.94±0.92 <sup>b</sup> | 46.78±1.88 <sup>a</sup>  |
| AST (U/L)     | 30.54±1.45 <sup>b</sup> | 94.14±4.50 <sup>a</sup>  |
| AST/ALT       | 1.06±0.080 <sup>b</sup> | 2.02±0.16 <sup>a</sup>   |
| GGT (U/L)     | 1.25±0.10 <sup>b</sup>  | 1.75±0.060 <sup>a</sup>  |
| DBIL (μmol/L) | 1.24±0.080 <sup>b</sup> | 2.01±0.090 <sup>a</sup>  |
| IBIL (μmol/L) | 0.22±0.05 <sup>b</sup>  | 1.54±0.10 <sup>a</sup>   |
| TBIL (μmol/L) | 1.44±0.080 <sup>b</sup> | 3.54±0.19 <sup>a</sup>   |
| ALP (U/L)     | 86.90±8.04 <sup>b</sup> | 124.40±8.13 <sup>a</sup> |
| CHE (KU/L)    | 0.10±0.020 <sup>b</sup> | 0.23±0.020 <sup>a</sup>  |
| TP (g/L)      | 50.18±1.34 <sup>a</sup> | 50.98±2.90 <sup>a</sup>  |
| ALB (g/L)     | 26.23±1.05 <sup>a</sup> | 26.90±0.55 <sup>a</sup>  |
| GLO (g/L)     | 23.94±4.72 <sup>a</sup> | 24.08±2.85 <sup>a</sup>  |
| ALB/GLO       | 1.10±0.050 <sup>a</sup> | 1.13±0.15 <sup>a</sup>   |
| TBA (μmol/L)  | 2.30±0.18 <sup>b</sup>  | 4.11±0.17 <sup>a</sup>   |

NC, normal group (0.9% normal saline 10 mL/kg/day); AL, alcohol group (40% alcohol 10 mL/kg/day). Values are presented as means ± SD for all groups (n = 10). <sup>a-b</sup> Means in the same column followed by different letters are significantly different ( $p < 0.05$ ) according to Tukey's multiple comparisons test.

Table S7. Effects of MF on serum biochemical markers in AH rats.

|              | NC                       | AL                       | SN                        | MFH                       | MFL                       |
|--------------|--------------------------|--------------------------|---------------------------|---------------------------|---------------------------|
| ALT (U/L)    | 32.48±2.79 <sup>c</sup>  | 54.44±8.28 <sup>a</sup>  | 40.09±3.97 <sup>b</sup>   | 39.90±5.58 <sup>b</sup>   | 43.40±7.17 <sup>b</sup>   |
| AST (U/L)    | 30.32±1.97 <sup>d</sup>  | 115.64±6.39 <sup>a</sup> | 63.47±8.99 <sup>c</sup>   | 60.43±3.52 <sup>c</sup>   | 83.02±6.79 <sup>b</sup>   |
| AST/ALT      | 0.94±0.11 <sup>c</sup>   | 2.16±0.28 <sup>a</sup>   | 1.59±0.21 <sup>b</sup>    | 1.54±0.25 <sup>b</sup>    | 1.95±0.34 <sup>a</sup>    |
| ALP (U/L)    | 103.35±5.27 <sup>b</sup> | 140.06±9.19 <sup>a</sup> | 110.40±12.28 <sup>b</sup> | 112.72±15.62 <sup>b</sup> | 132.98±11.19 <sup>a</sup> |
| CHE (KU/L)   | 0.16±0.028 <sup>d</sup>  | 0.35±0.048 <sup>a</sup>  | 0.21±0.021 <sup>c</sup>   | 0.22±0.036 <sup>c</sup>   | 0.30±0.027 <sup>b</sup>   |
| TP (g/L)     | 52.93±3.49 <sup>a</sup>  | 51.81±4.81 <sup>a</sup>  | 51.67±2.72 <sup>a</sup>   | 51.67±3.79 <sup>a</sup>   | 50.75±1.13 <sup>a</sup>   |
| ALB (g/L)    | 25.17±2.22 <sup>a</sup>  | 26.62±2.45 <sup>a</sup>  | 26.47±1.48 <sup>a</sup>   | 26.08±3.01 <sup>a</sup>   | 26.23±1.30 <sup>a</sup>   |
| GLO (g/L)    | 27.77±3.42 <sup>a</sup>  | 23.65±1.40 <sup>c</sup>  | 25.20±1.73 <sup>b</sup>   | 25.58±1.42 <sup>b</sup>   | 25.07±1.14 <sup>b</sup>   |
| ALB/GLO      | 0.92±0.17 <sup>a</sup>   | 1.10±0.070 <sup>a</sup>  | 1.06±0.073 <sup>a</sup>   | 1.02±0.12 <sup>a</sup>    | 1.05±0.070 <sup>a</sup>   |
| TBA (μmol/L) | 3.45±0.20 <sup>c</sup>   | 8.10±0.18 <sup>a</sup>   | 4.62±0.90 <sup>d</sup>    | 4.98±0.13 <sup>c</sup>    | 5.75±1.55 <sup>b</sup>    |

NC, normal group (0.9% normal saline 10 mL/kg/day); AL, alcohol group (40% alcohol 10 mL/kg/day); SN, silybin group (40% alcohol 10 mL/kg/day + SN 18.9 mg/kg/day); MFH, high-dose mangiferin group (40% alcohol 10 mL/kg/day + MF 100 mg/kg/day); MFL, low-dose mangiferin group (40% alcohol 10 mL/kg/day + MF 50 mg/kg/day). Values are presented as means ± SD for all groups (n = 10). <sup>a-c</sup> Means in the same column followed by different letters are significantly different ( $p < 0.05$ ) according to Tukey's multiple comparisons test.

Table S8. Effects of MF on serum SOD, GSH-PX, MDA, CAT and NO in AH rats.

|               | NC                       | AL                        | SN                       | MFH                       | MFL                      |
|---------------|--------------------------|---------------------------|--------------------------|---------------------------|--------------------------|
| SOD (U/mL)    | 245.11±9.61 <sup>a</sup> | 189.54±16.22 <sup>c</sup> | 210.52±9.82 <sup>b</sup> | 207.45±10.48 <sup>b</sup> | 203.39±4.40 <sup>b</sup> |
| GSH-PX        | 36.00±1.94 <sup>a</sup>  | 19.55±1.61 <sup>d</sup>   | 31.37±2.59 <sup>b</sup>  | 29.44±2.49 <sup>b</sup>   | 22.68±3.25 <sup>c</sup>  |
| MDA (nmol/mL) | 5.23±0.75 <sup>d</sup>   | 8.38±0.72 <sup>a</sup>    | 6.80±0.62 <sup>c</sup>   | 6.99±0.21 <sup>bc</sup>   | 7.57±0.40 <sup>b</sup>   |
| CAT (U/mL)    | 12.93±1.57 <sup>a</sup>  | 6.16±0.55 <sup>c</sup>    | 9.35±1.30 <sup>b</sup>   | 11.55±0.96 <sup>a</sup>   | 9.12±1.36 <sup>b</sup>   |
| NO (μmol/L)   | 40.90±5.67 <sup>c</sup>  | 96.32±14.61 <sup>a</sup>  | 60.28±6.09 <sup>b</sup>  | 58.75±7.38 <sup>bc</sup>  | 68.45±2.91 <sup>b</sup>  |

NC, normal group (0.9% normal saline 10 mL/kg/day); AL, alcohol group (40% alcohol 10 mL/kg/day); SN, silybin group (40% alcohol 10 mL/kg/day + SN 18.9 mg/kg/day); MFH, high-dose mangiferin group (40% alcohol 10 mL/kg/day + MF 100 mg/kg/day); MFL, low-dose mangiferin group (40% alcohol 10 mL/kg/day + MF 50 mg/kg/day). Values are presented as means ± SD for all groups (n = 10). <sup>a-d</sup> Means in the same column followed by different letters are significantly different ( $p < 0.05$ ) according to Tukey's multiple comparisons test.

Table S9. Effects of MF on liver SOD, GSH-PX, MDA and ROS in AH rats.

|                     | NC                        | AL                         | SN                        | MFH                       | MFL                        |
|---------------------|---------------------------|----------------------------|---------------------------|---------------------------|----------------------------|
| SOD (U/mgprot)      | 384.03±55.88 <sup>a</sup> | 193.93±29.57 <sup>c</sup>  | 254.92±20.60 <sup>b</sup> | 250.53±24.75 <sup>b</sup> | 231.88±38.25 <sup>bc</sup> |
| GSH-PX (μmol/gprot) | 59.87±4.74 <sup>a</sup>   | 17.06±3.12 <sup>c</sup>    | 27.34±7.90 <sup>b</sup>   | 26.82±5.39 <sup>b</sup>   | 24.07±5.49 <sup>bc</sup>   |
| MDA (nmol/mgprot)   | 8.36±0.15 <sup>d</sup>    | 16.41±0.21 <sup>a</sup>    | 10.52±0.13 <sup>c</sup>   | 12.42±0.20 <sup>b</sup>   | 10.45±0.22 <sup>c</sup>    |
| ROS (IU/mL)         | 631.43±29.83 <sup>c</sup> | 918.53±108.38 <sup>a</sup> | 661.07±37.17 <sup>c</sup> | 684.07±41.02 <sup>c</sup> | 803.54±61.75 <sup>b</sup>  |

NC, normal group (0.9% normal saline 10 mL/kg/day); AL, alcohol group (40% alcohol 10 mL/kg/day); SN, silybin group (40% alcohol 10 mL/kg/day + SN 18.9 mg/kg/day); MFH, high-dose mangiferin group (40% alcohol 10 mL/kg/day + MF 100 mg/kg/day); MFL, low-dose mangiferin group (40% alcohol 10 mL/kg/day + MF 50 mg/kg/day). Values are presented as means ± SD for all groups (n = 10). <sup>a-d</sup> Means in the same column followed by different letters are significantly different ( $p < 0.05$ ) according to Tukey's multiple comparisons test.

Table S10. Effects of MF on brain SOD, MDA and GSH-PX in AH rats.

|                     | NC                       | AL                       | SN                       | MFH                      | MFL                      |
|---------------------|--------------------------|--------------------------|--------------------------|--------------------------|--------------------------|
| SOD (U/mgprot)      | 4.43±0.41 <sup>a</sup>   | 2.54±0.19 <sup>c</sup>   | 4.18±0.25 <sup>a</sup>   | 4.01±0.76 <sup>a</sup>   | 3.46±0.16 <sup>b</sup>   |
| GSH-PX (μmol/gprot) | 28.13±1.42 <sup>a</sup>  | 17.01±0.91 <sup>d</sup>  | 24.93±1.18 <sup>b</sup>  | 24.43±1.31 <sup>b</sup>  | 20.23±4.56 <sup>c</sup>  |
| MDA (nmol/mgprot)   | 0.069±0.017 <sup>c</sup> | 0.17±0.0086 <sup>a</sup> | 0.081±0.019 <sup>c</sup> | 0.089±0.015 <sup>c</sup> | 0.13±0.0048 <sup>b</sup> |

NC, normal group (0.9% normal saline 10 mL/kg/day); AL, alcohol group (40% alcohol 10 mL/kg/day); SN, silybin group (40% alcohol 10 mL/kg/day + SN 18.9 mg/kg/day); MFH, high-dose mangiferin group (40% alcohol 10 mL/kg/day + MF 100 mg/kg/day); MFL, low-dose mangiferin group (40% alcohol 10 mL/kg/day + MF 50 mg/kg/day). Values are presented as means ± SD for all groups (n = 10). <sup>a-d</sup> Means in the same column followed by different letters are significantly different ( $p < 0.05$ ) according to Tukey's multiple comparisons test.

Table S11. Effects of MF on hepatic lipid measurements in AH rats.

|                | NC                      | AL                      | SN                      | MFH                     | MFL                     |
|----------------|-------------------------|-------------------------|-------------------------|-------------------------|-------------------------|
| TG (mmol/g)    | 3.71±0.92 <sup>c</sup>  | 5.95±0.95 <sup>a</sup>  | 4.01±0.86 <sup>bc</sup> | 4.08±0.86 <sup>bc</sup> | 4.93±0.21 <sup>b</sup>  |
| TC (mmol/g)    | 1.57±0.29 <sup>c</sup>  | 2.70±0.43 <sup>a</sup>  | 2.09±0.20 <sup>b</sup>  | 2.11±0.28 <sup>b</sup>  | 2.31±0.31 <sup>b</sup>  |
| HDL-C (mmol/g) | 3.56±0.23 <sup>a</sup>  | 2.66±0.17 <sup>d</sup>  | 3.33±0.43 <sup>b</sup>  | 3.24±0.14 <sup>c</sup>  | 3.03±0.26 <sup>d</sup>  |
| LDL-C (mmol/g) | 0.18±0.018 <sup>a</sup> | 0.32±0.029 <sup>b</sup> | 0.20±0.038 <sup>c</sup> | 0.21±0.013 <sup>c</sup> | 0.28±0.010 <sup>c</sup> |

NC, normal group (0.9% normal saline 10 mL/kg/day); AL, alcohol group (40% alcohol 10 mL/kg/day); SN, silybin group (40% alcohol 10 mL/kg/day + SN 18.9 mg/kg/day); MFH, high-dose mangiferin group (40% alcohol 10 mL/kg/day + MF 100 mg/kg/day); MFL, low-dose mangiferin group (40% alcohol 10 mL/kg/day + MF 50 mg/kg/day). Values are presented as means ± SD for all groups (n = 10). <sup>a-d</sup> Means in the same column followed by different letters are significantly different ( $p < 0.05$ ) according to Tukey's multiple comparisons test.

Table S12. Effects of MF on fecal lipid measurements in AH rats.

|             | NC                          | AL                          | SN                          | MFH                          | MFL                         |
|-------------|-----------------------------|-----------------------------|-----------------------------|------------------------------|-----------------------------|
| TG (mmol/g) | 0.0048±0.00088 <sup>c</sup> | 0.0084±0.00059 <sup>a</sup> | 0.0054±0.0012 <sup>c</sup>  | 0.0054±0.0012 <sup>c</sup>   | 0.0067±0.00086 <sup>b</sup> |
| TC (mmol/g) | 0.0053±0.0011 <sup>c</sup>  | 0.0083±0.0011 <sup>a</sup>  | 0.0060±0.0013 <sup>bc</sup> | 0.0062±0.00092 <sup>bc</sup> | 0.0069±0.0010 <sup>b</sup>  |

NC, normal group (0.9% normal saline 10 mL/kg/day); AL, alcohol group (40% alcohol 10 mL/kg/day); SN, silybin group (40% alcohol 10 mL/kg/day + SN 18.9 mg/kg/day); MFH, high-dose mangiferin group (40% alcohol 10 mL/kg/day + MF 100 mg/kg/day); MFL, low-dose mangiferin group (40% alcohol 10 mL/kg/day + MF 50 mg/kg/day). Values are presented as means ± SD for all groups (n = 10). <sup>a-c</sup> Means in the same column followed by different letters are significantly different ( $p < 0.05$ ) according to Tukey's multiple comparisons test.

**A**

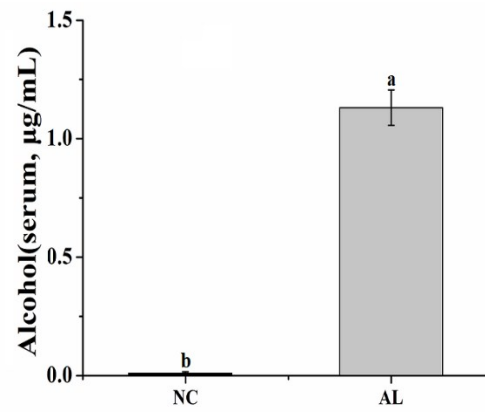

| <b>B</b> | Visual observation | H&E staining | Oil Red O staining |
|----------|--------------------|--------------|--------------------|
| NC       |                    |              |                    |
| AL       |                    |              |                    |

Fig.S1. (A) The content of alcohol in the serum in the 6-week; (B) The liver visual observation, liver sections were stained with haematoxylin and eosin (H&E) and oil red O to demonstrate the histopathological morphology (200 $\times$ ) in the middle of the experiment. NC, normal group (0.9% normal saline 10 mL/kg/day); AL, alcohol group (40% alcohol 10 mL/kg/day). Values are presented as means  $\pm$  SD for all groups (n = 10). <sup>a-b</sup> Means in the same column followed by different letters are significantly different ( $p < 0.05$ ) according to Tukey's multiple comparisons test.



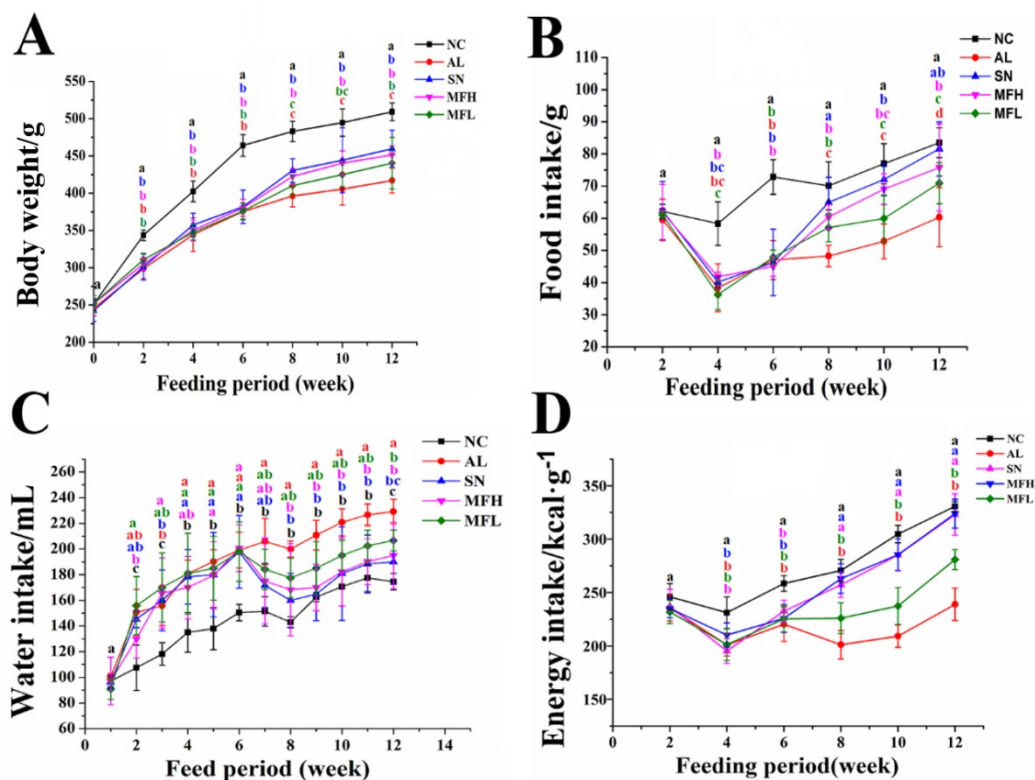

Fig.S2. Effects of MF on body mass, food intake, water and energy intake in AH rats. (A) Body weight; (B) Food intake; (C) Water intake; (D) Energy intake. NC, normal group (0.9% normal saline 10 mL/kg/day); AL, alcohol group (40% alcohol 10 mL/kg/day); SN, silybin group (40% alcohol 10 mL/kg/day + SN 18.9 mg/kg/day); MFH, high-dose mangiferin group (40% alcohol 10 mL/kg/day + MF 100 mg/kg/day); MFL, low-dose mangiferin group (40% alcohol 10 mL/kg/day + MF 50 mg/kg/day). Values are presented as means  $\pm$  SD for all groups ( $n = 10$ ). <sup>a-d</sup> Means in the same column followed by different letters are significantly different ( $p < 0.05$ ) according to Tukey's multiple comparisons test.

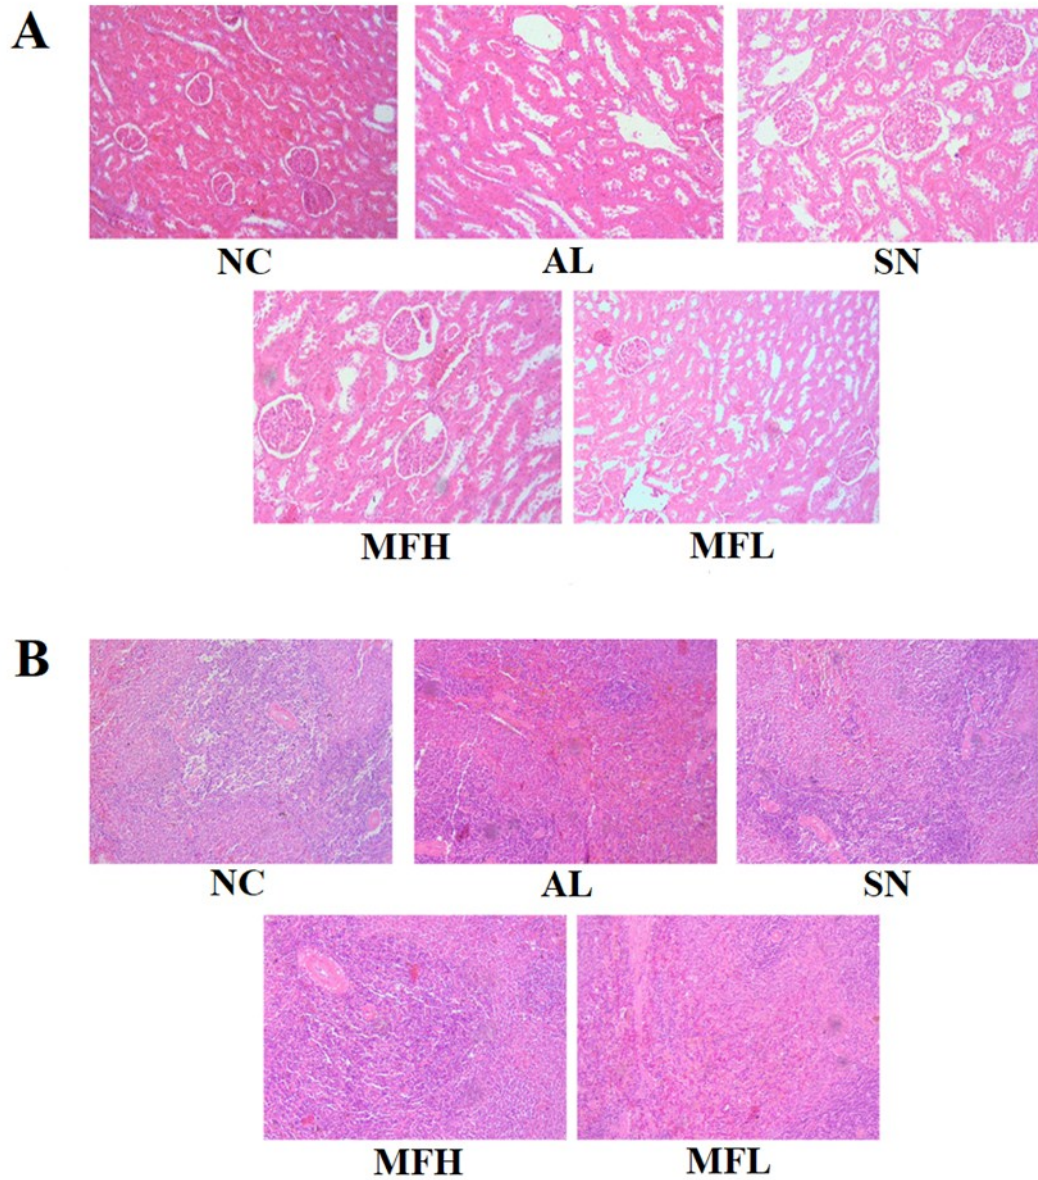

Fig.S3. The kidney and spleen sections were stained with haematoxylin and eosin (H&E) to demonstrate the histopathological morphology (200×) in the end of the experiment. NC, normal group (0.9% normal saline 10 mL/kg/day); AL, alcohol group (40% alcohol 10 mL/kg/day); SN, silybin group (40% alcohol 10 mL/kg/day + SN 18.9 mg/kg/day); MFH, high-dose mangiferin group (40% alcohol 10 mL/kg/day + MF 100 mg/kg/day); MFL, low-dose mangiferin group (40% alcohol 10 mL/kg/day + MF 50 mg/kg/day).

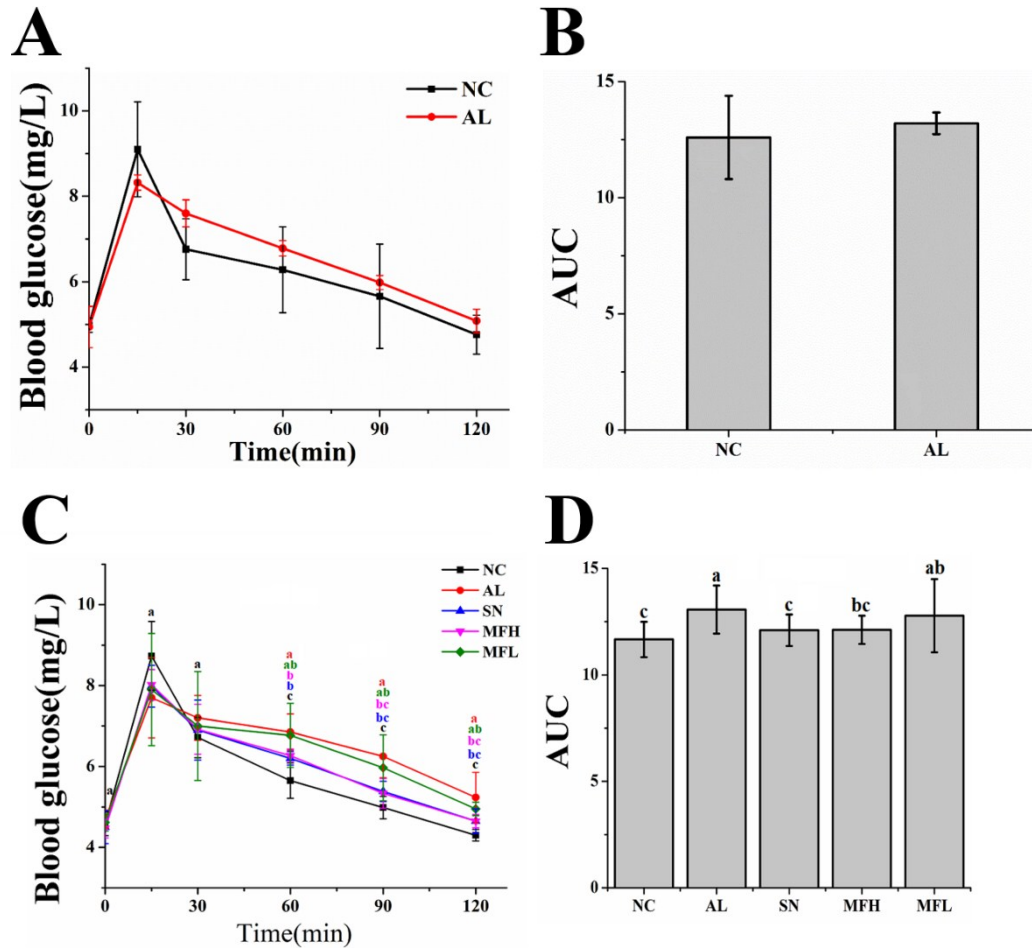

Fig.S4. Effects of MF on glucose intolerance in AH rats. (A) Blood glucose levels and (B) AUC in the middle of the experiment, (C) Blood glucose levels and (D) AUC in the end of the experiment. NC, normal group (0.9% normal saline 10 mL/kg/day); AL, alcohol group (40% alcohol 10 mL/kg/day); SN, silybin group (40% alcohol 10 mL/kg/day + SN 18.9 mg/kg/day); MFH, high-dose mangiferin group (40% alcohol 10 mL/kg/day + MF 100 mg/kg/day); MFL, low-dose mangiferin group (40% alcohol 10 mL/kg/day + MF 50 mg/kg/day). Values are presented as means  $\pm$  SD for all groups ( $n = 10$ ). <sup>a-d</sup> Means in the same column followed by different letters are significantly different ( $p < 0.05$ ) according to Tukey's multiple comparisons test.

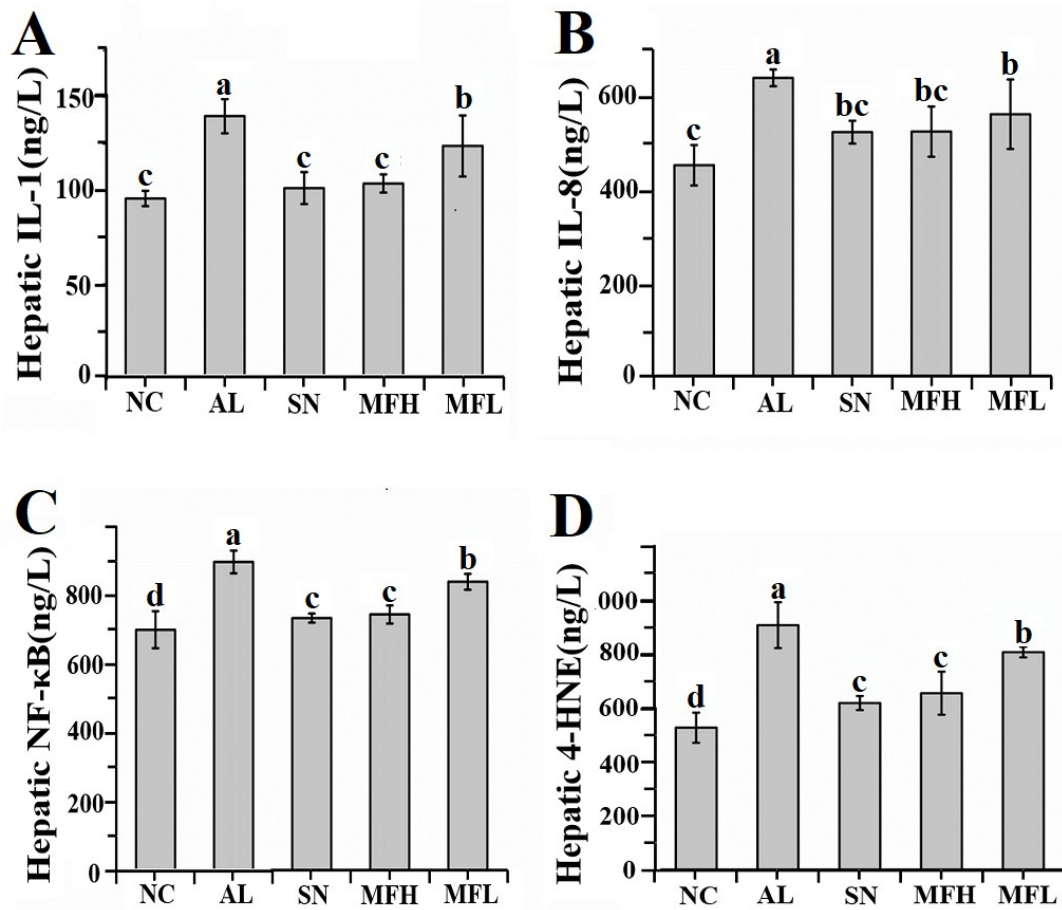

Fig.S5. Effects of MF on hepatic IL-1, IL-8, NF-κB and 4-HNE in AH rats. The levels of (A) IL-1, (B) IL-8, (C) NF-κB and (D) 4-HNE in liver at the end of the experiment. NC, normal group (0.9% normal saline 10 mL/kg/day); AL, alcohol group (40% alcohol 10 mL/kg/day); SN, silybin group (40% alcohol 10 mL/kg/day + SN 18.9 mg/kg/day); MFH, high-dose mangiferin group (40% alcohol 10 mL/kg/day + MF 100 mg/kg/day); MFL, low-dose mangiferin group (40% alcohol 10 mL/kg/day + MF 50 mg/kg/day). Values are presented as means  $\pm$  SD for all groups ( $n = 10$ ). <sup>a-d</sup> Means in the same column followed by different letters are significantly different ( $p < 0.05$ ) according to Tukey's multiple comparisons test.
